# Supplementary material for: Acid-mediated transformation of spirocyclopropyl oxetanes: a facile approach to spirocyclopropyl butenolides and γ-butyrolactones
Source: Royal Society of Chemistry journal article supplement (doi:10.1039/c3ra00178d), 2013-01-01

## Electronic Supplementary Information

### Acid-Mediated Transformation of Spirocyclopropyl Oxetanes: A Facile Approach to Spirocyclopropyl Butenolides and $\gamma$ -Butyrolactones

Dong-Dong Wu, Cheng-Mei Huang, Yi-Han Wu, Hoong-Kun Fun, Jian-Hua Xu and Yan Zhang\*

**Table 1** Optimization on the condition for the transformation from **1a** to **2**.

| Entry | Equiv of HCl | Temperature | Time (hr) | Products and yields <sup>a</sup> |
|-------|--------------|-------------|-----------|----------------------------------|
| 1     | 0.1          | r.t.        | 0.5       | - <sup>b</sup>                   |
| 2     | 1            | r.t.        | 0.5       | - <sup>b</sup>                   |
| 3     | 10           | r.t.        | 0.5       | - <sup>c</sup>                   |
| 4     | 10           | r.t.        | 24        | <b>2</b> (78%)                   |
| 5     | 100          | r.t.        | 0.5       | <b>2</b> (80%)                   |

<sup>a</sup> Isolated yield. <sup>b</sup> Almost no reaction. <sup>c</sup> Complex mixture

#### Crystal structure of compound **17**

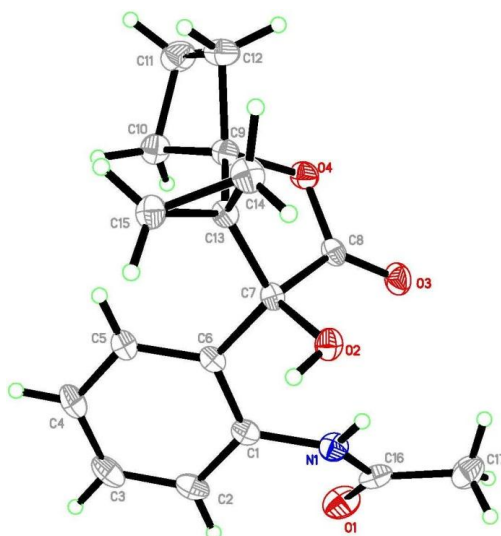

### Copies of $^1\text{H}$ NMR and $^{13}\text{C}$ NMR spectra of all new compounds

#### 1c- $^1\text{H}$ NMR( $\text{CDCl}_3$ )

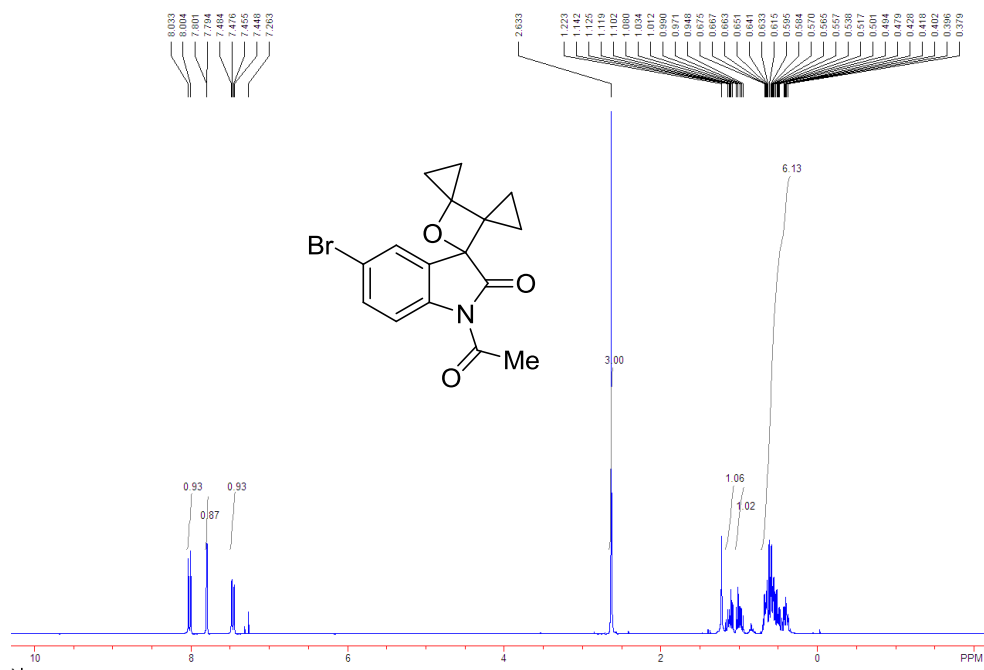

#### 1c- $^{13}\text{C}$ NMR( $\text{CDCl}_3$ )

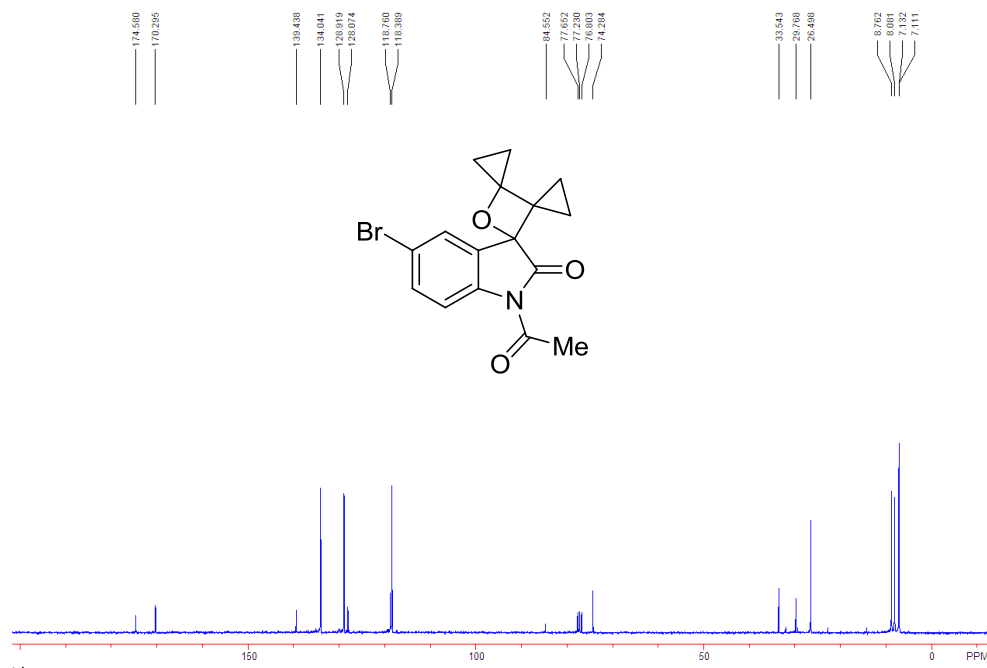

### 1d-<sup>1</sup>H NMR(CDCl<sub>3</sub>)

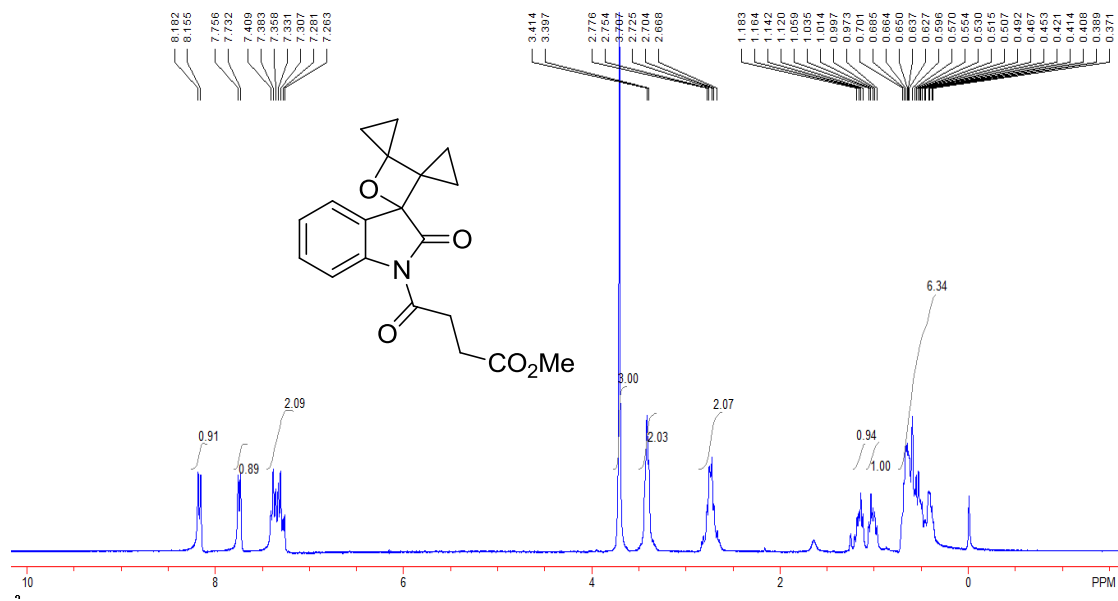

### 1d-<sup>13</sup>C NMR(CDCl<sub>3</sub>)

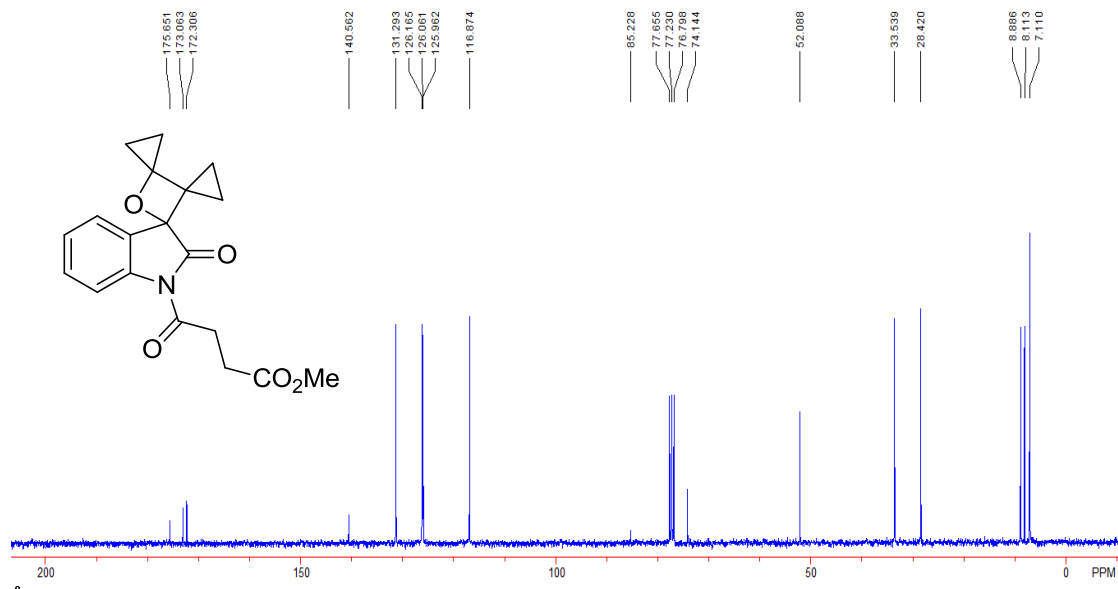

### 1e-<sup>1</sup>H NMR(CDCl<sub>3</sub>)

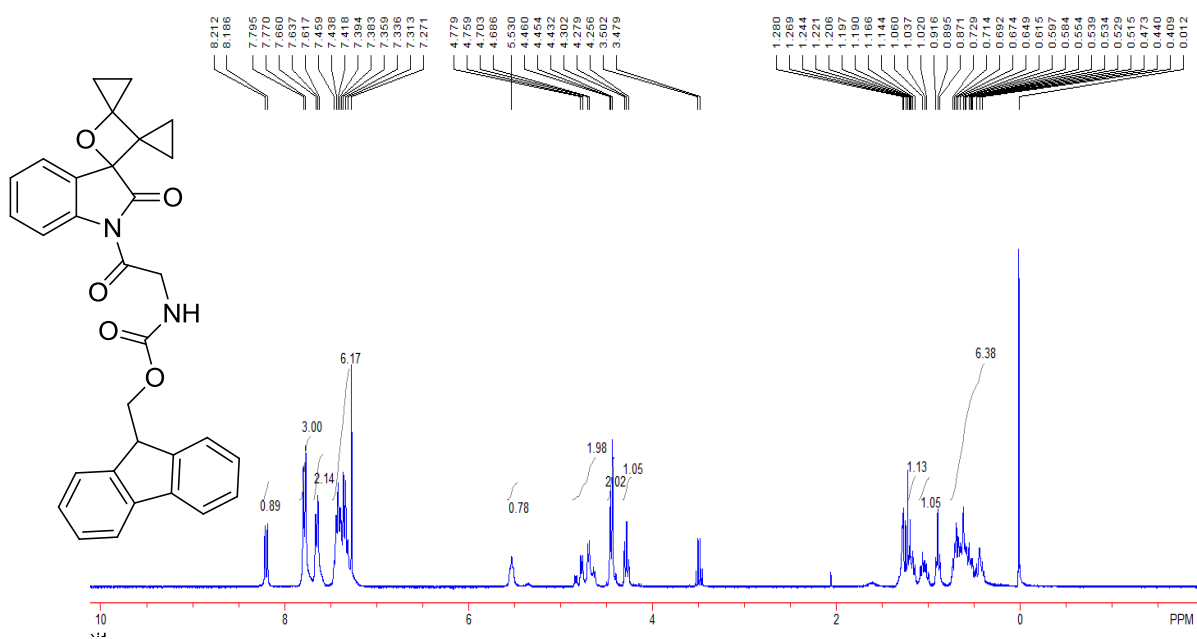

### 1e-<sup>13</sup>C NMR(CDCl<sub>3</sub>)

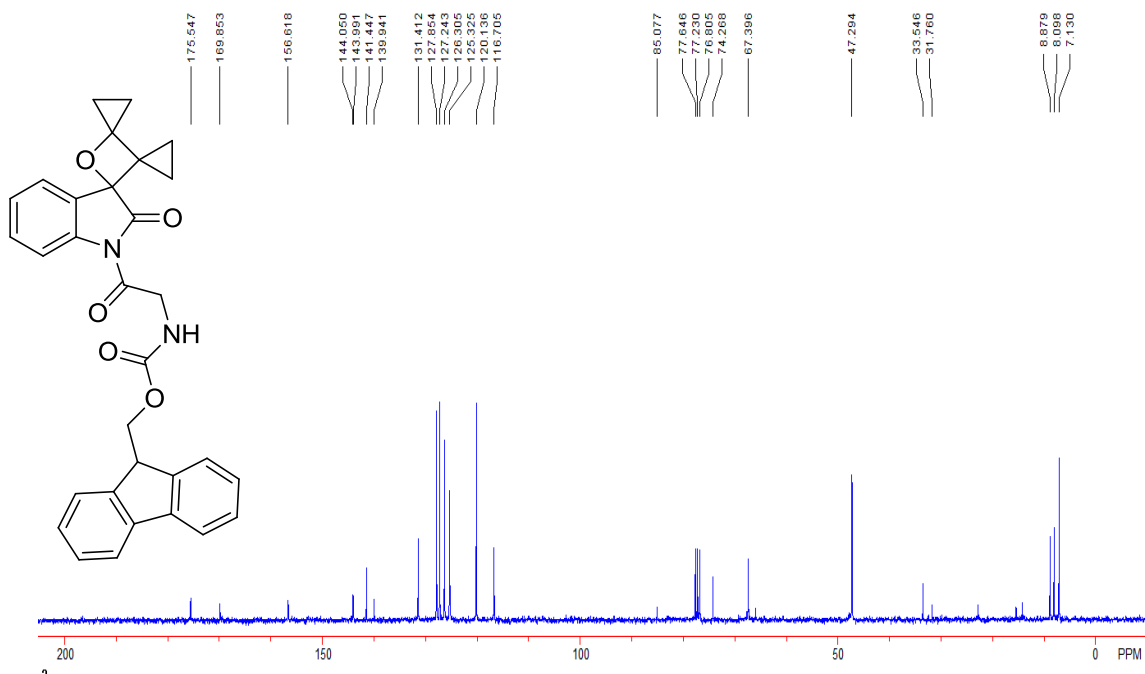

## 2-<sup>1</sup>H NMR(CDCl<sub>3</sub>)

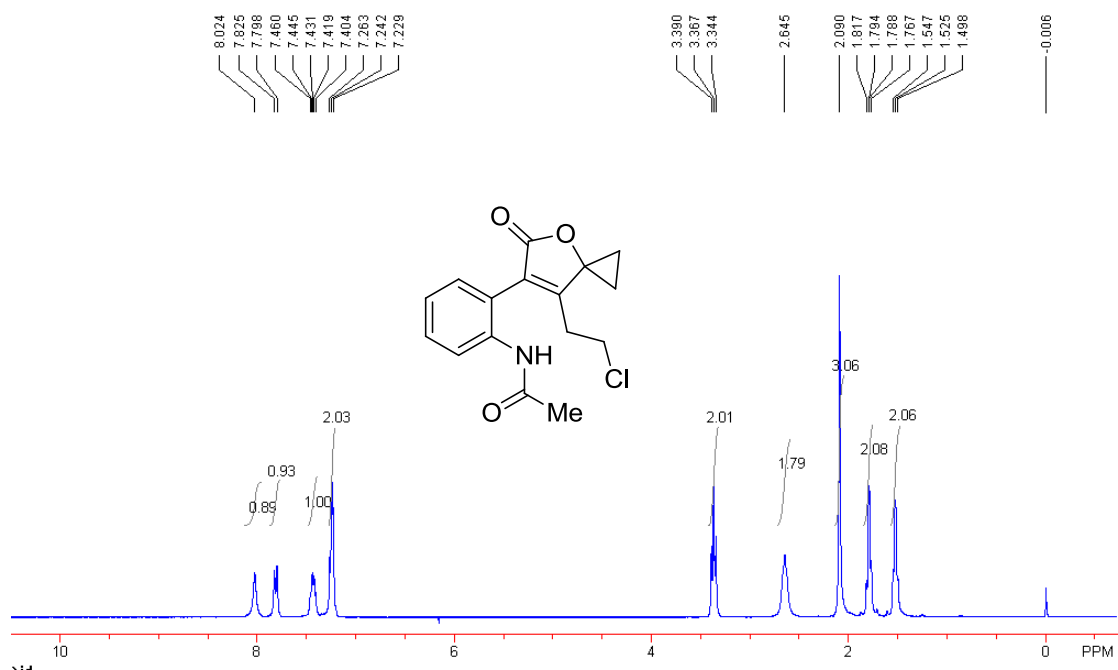

## 2-<sup>13</sup>C NMR(CDCl<sub>3</sub>)

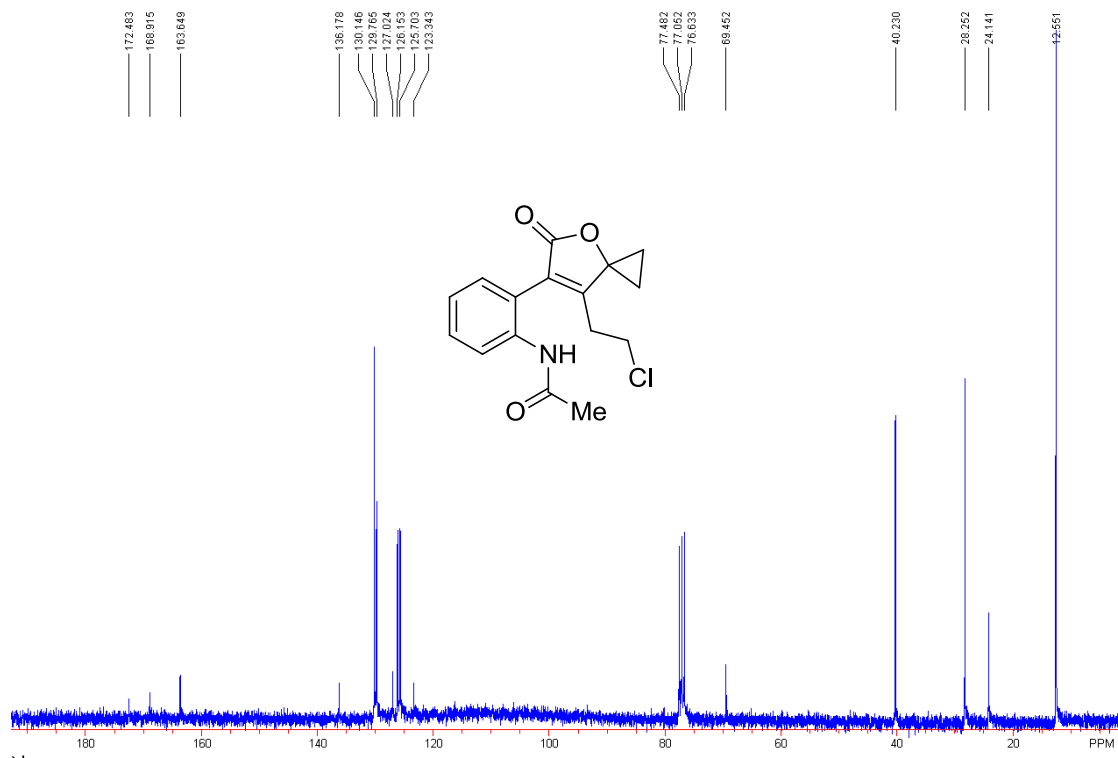

### $^1\text{H}$ NMR( $\text{CDCl}_3$ )

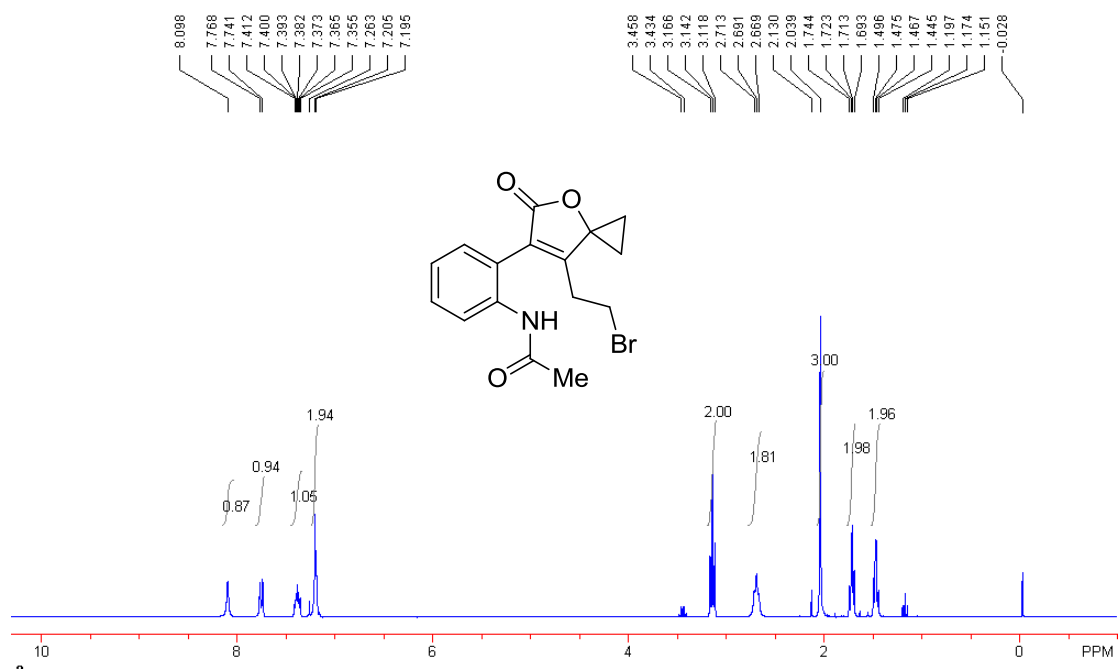

### $^{13}\text{C}$ NMR( $\text{CDCl}_3$ )

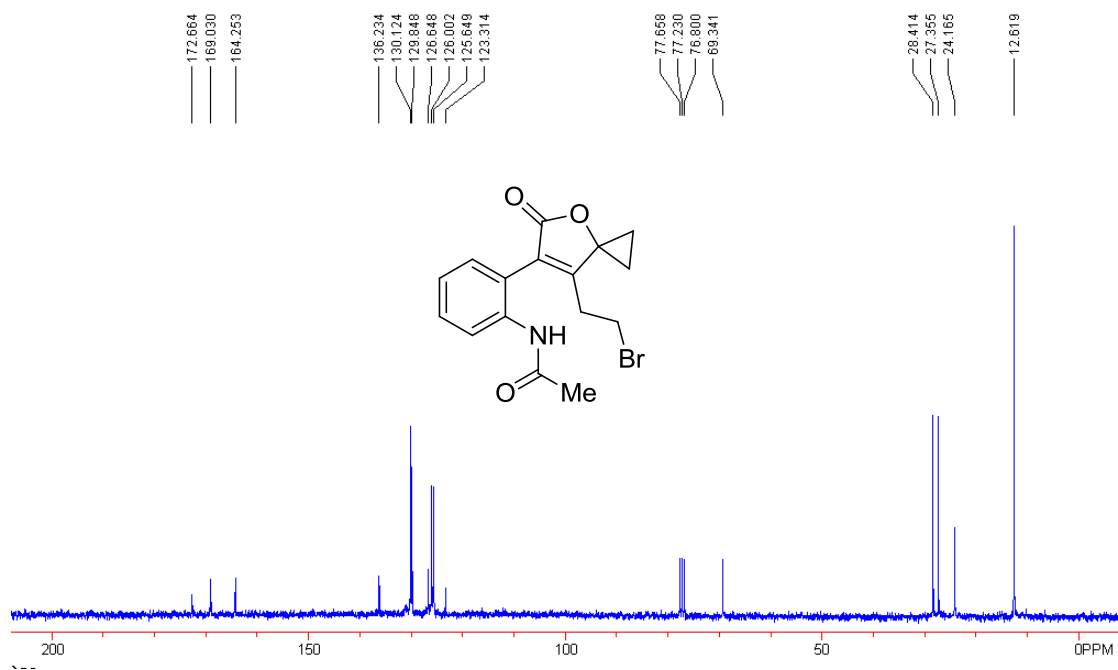

### 4-<sup>1</sup>H NMR(CDCl<sub>3</sub>)

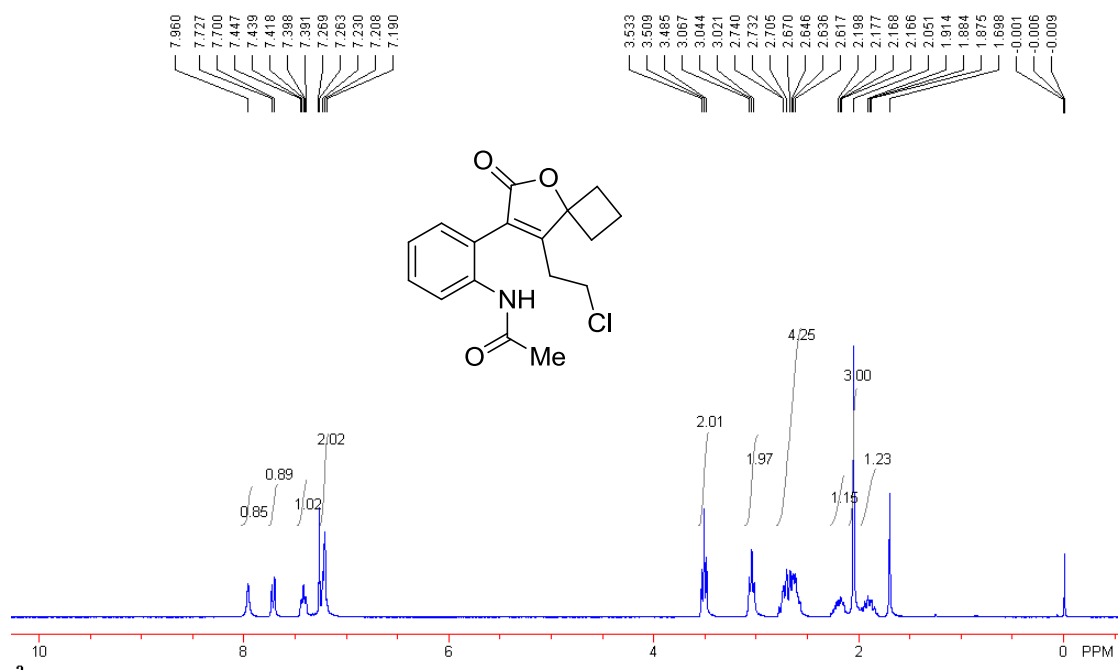

### 4-<sup>13</sup>C NMR(CDCl<sub>3</sub>)

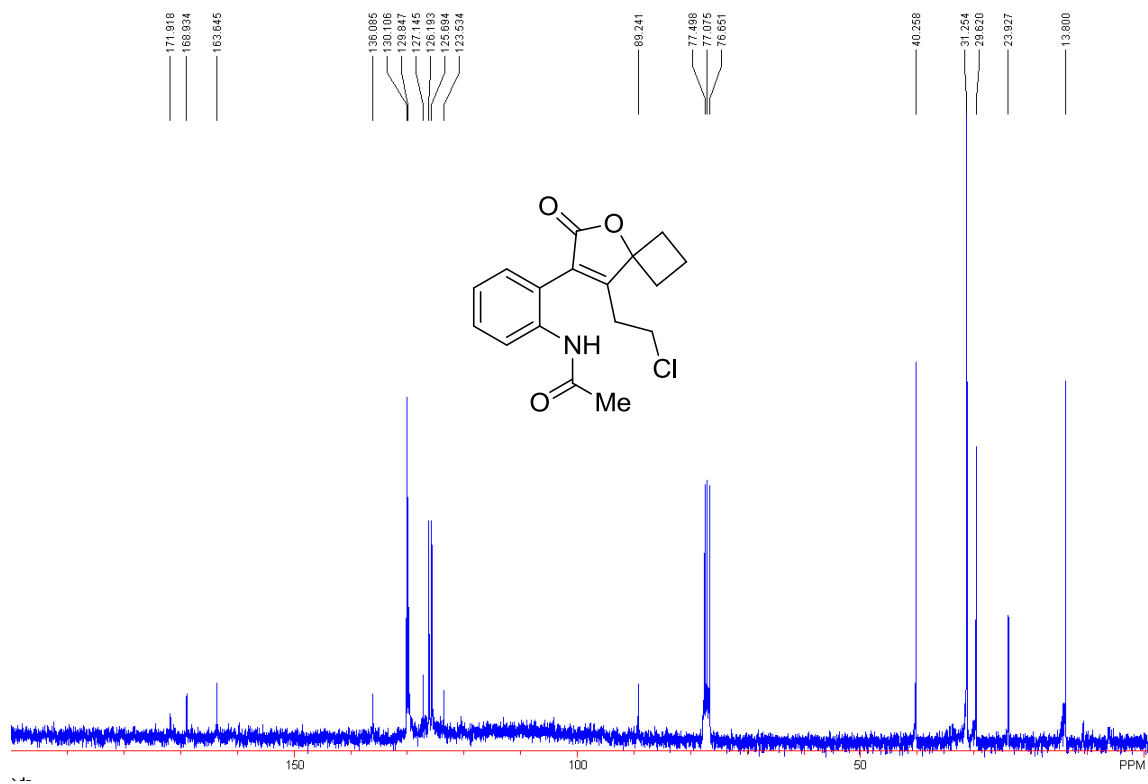

### 5-<sup>1</sup>H NMR(CDCl<sub>3</sub>)

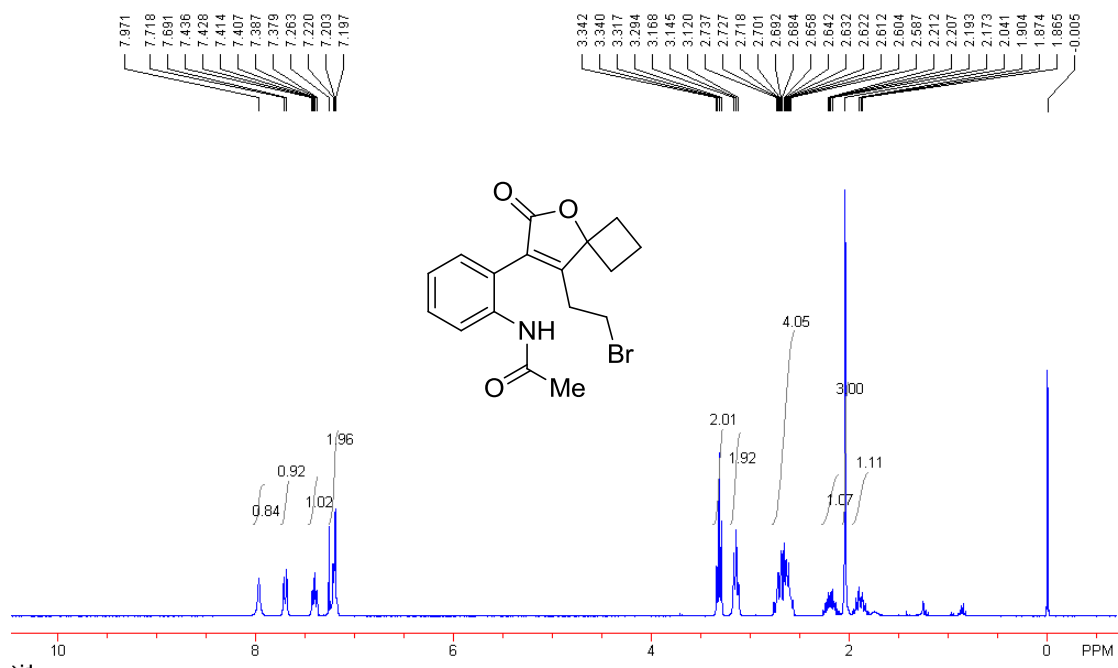

### 5-<sup>13</sup>C NMR(CDCl<sub>3</sub>)

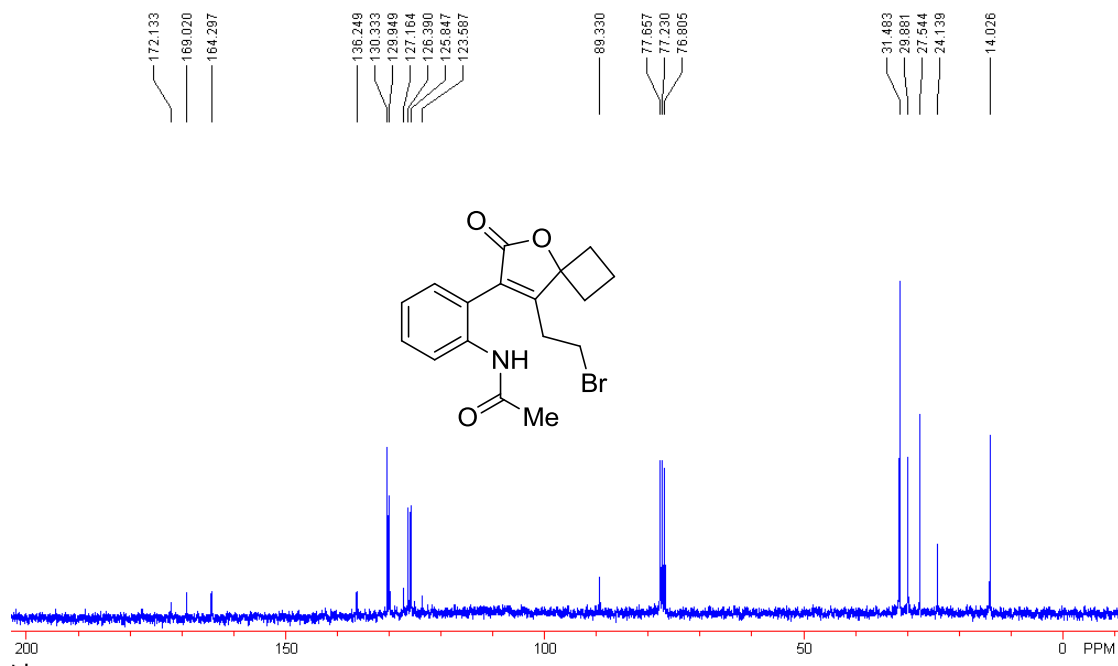



### 6-<sup>1</sup>H NMR(CDCl<sub>3</sub>)

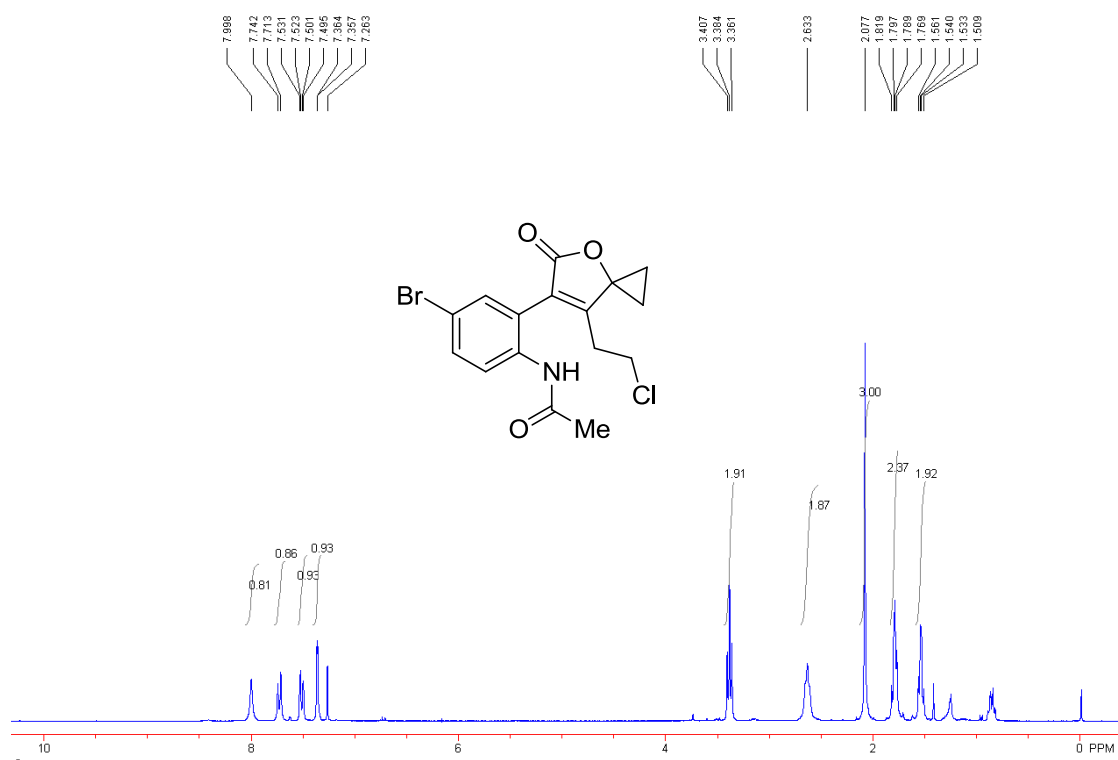

### 6-<sup>13</sup>C NMR(CDCl<sub>3</sub>)

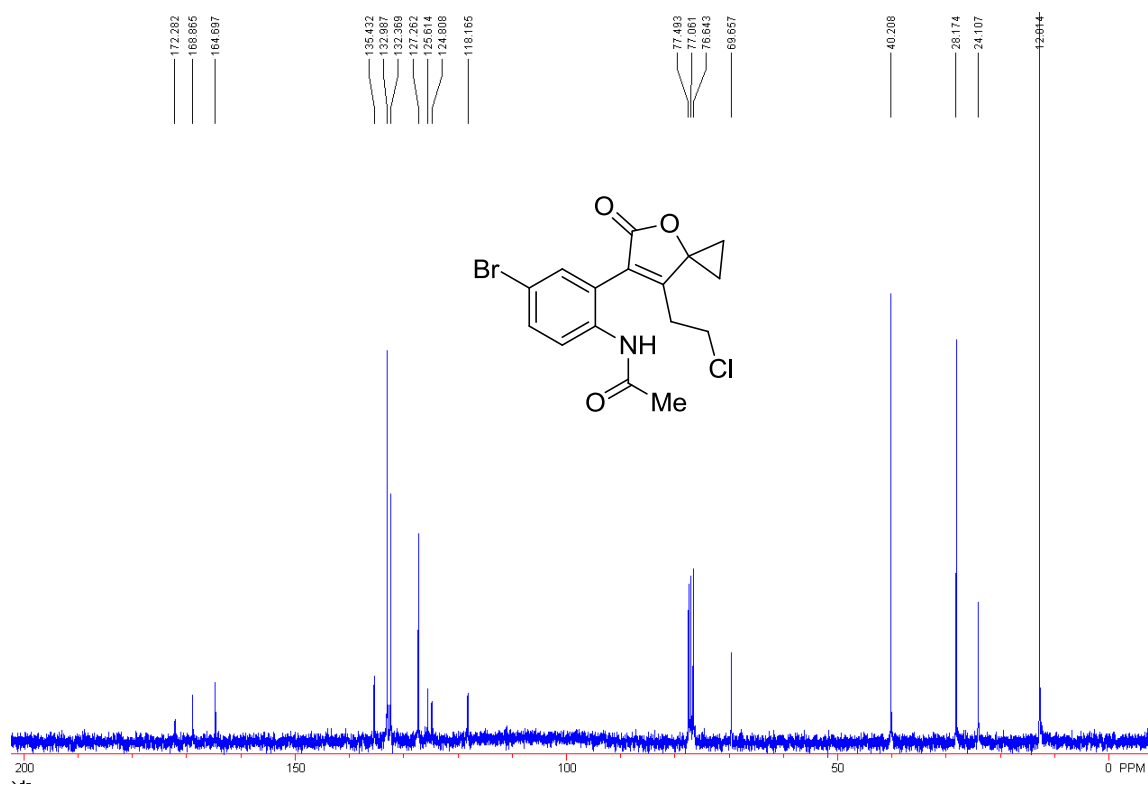

### 7-<sup>1</sup>H NMR(CDCl<sub>3</sub>)

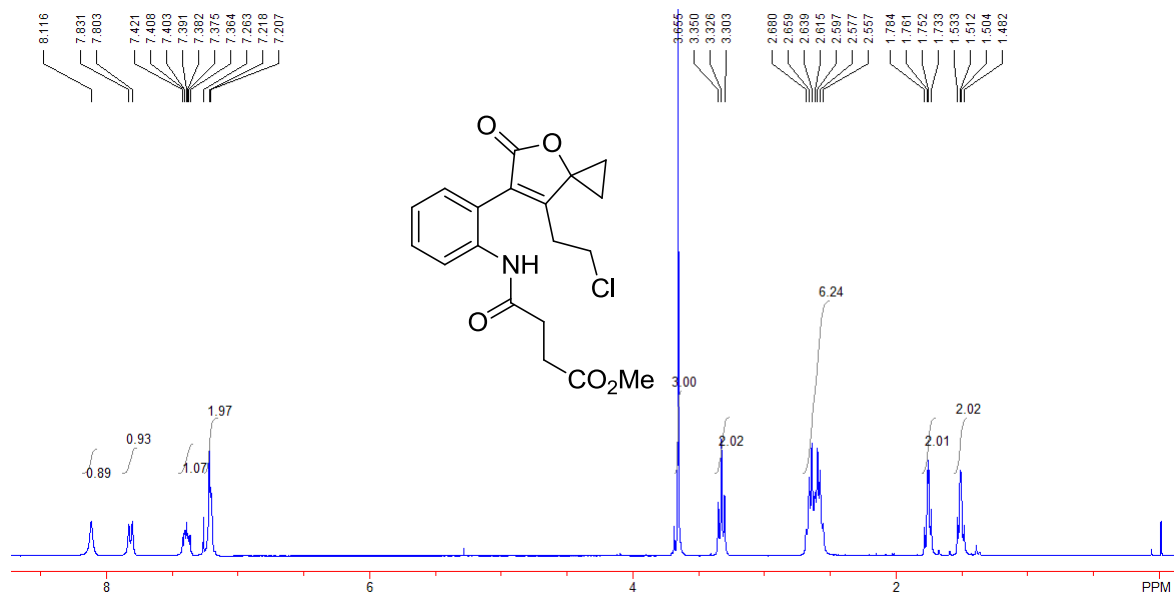

### 7-<sup>13</sup>C NMR(CDCl<sub>3</sub>)

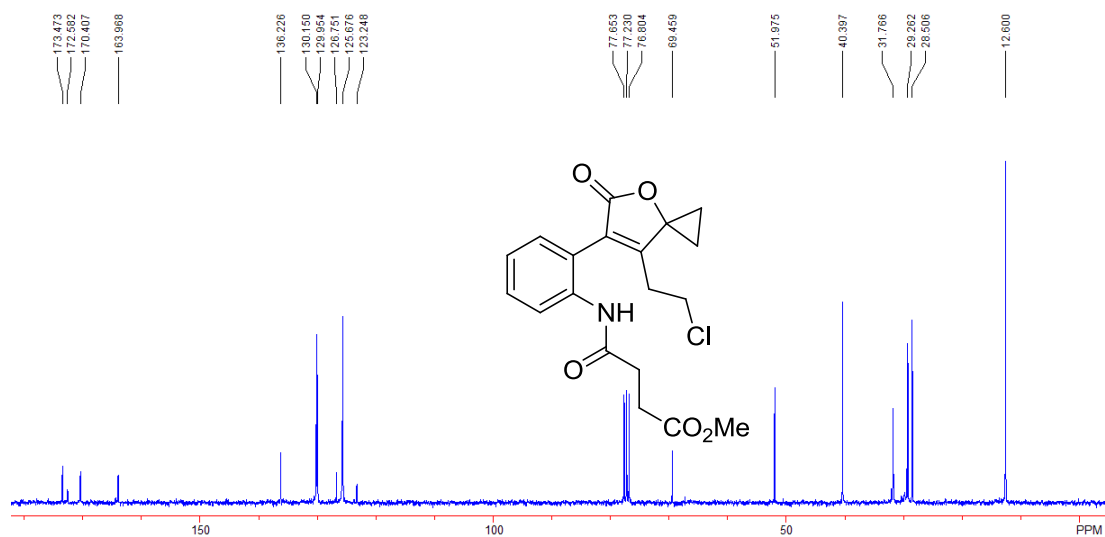

### 8-<sup>1</sup>H NMR(CDCl<sub>3</sub>)

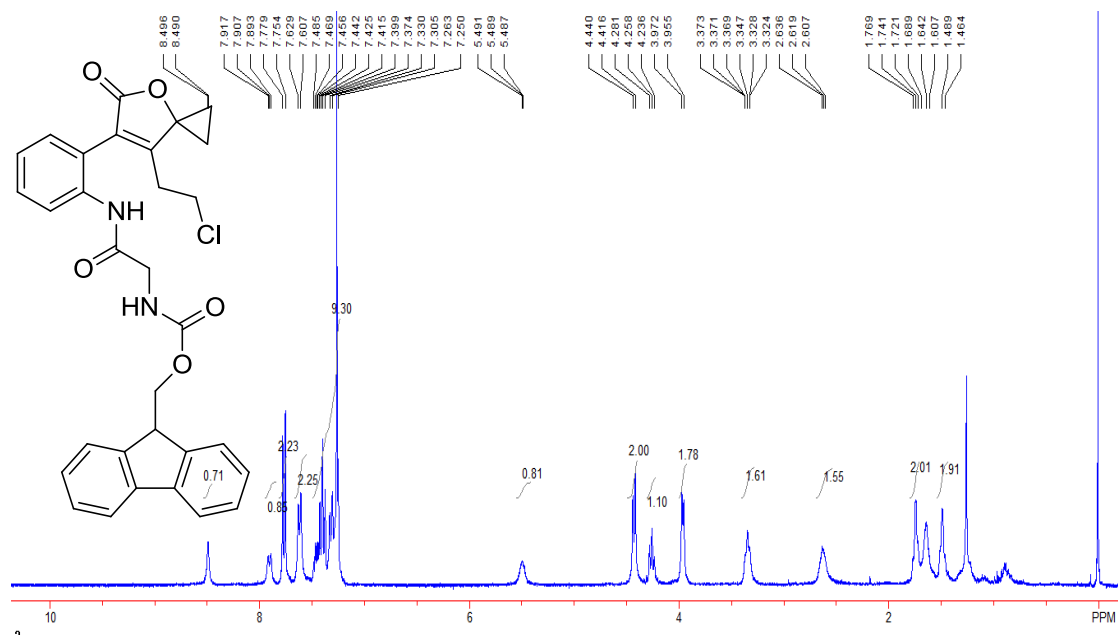

### 8-<sup>13</sup>C NMR(CDCl<sub>3</sub>)

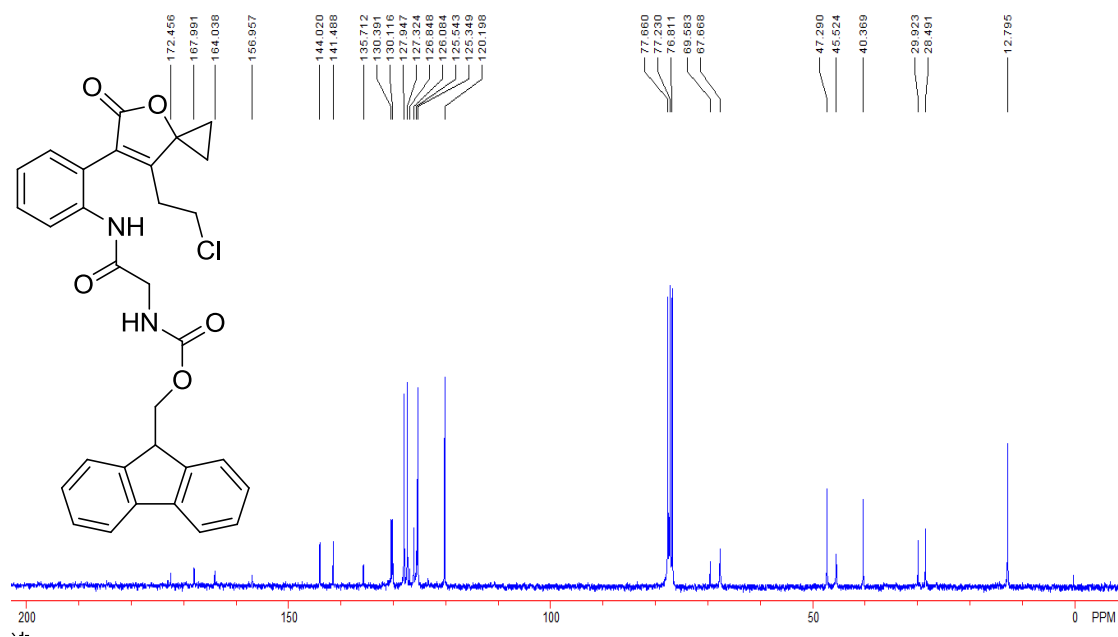

### 9-<sup>1</sup>H NMR(CDCl<sub>3</sub>)

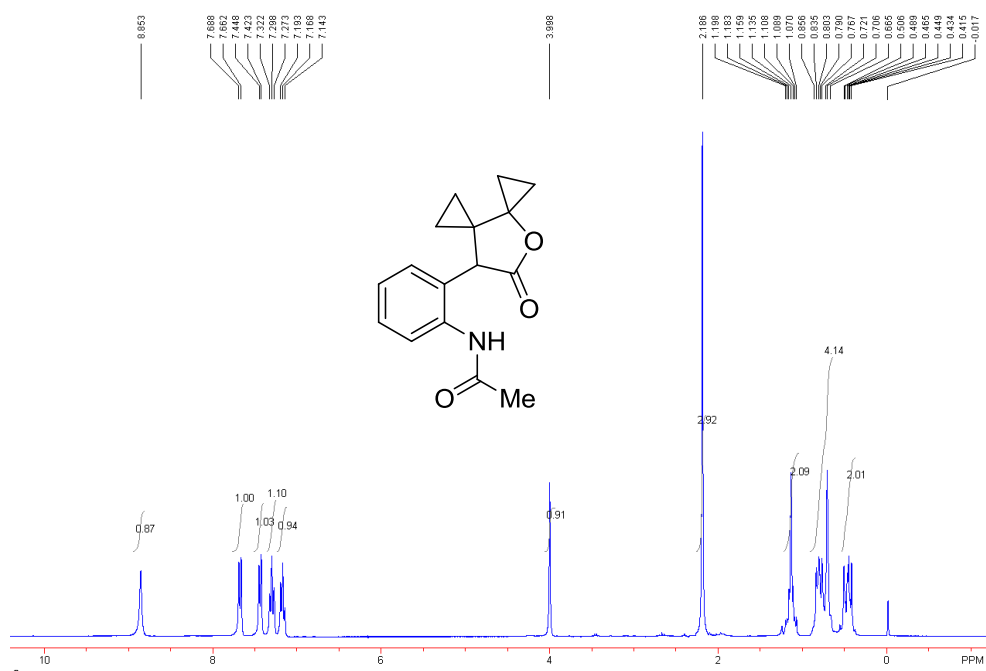

### 9-<sup>13</sup>C NMR(CDCl<sub>3</sub>)

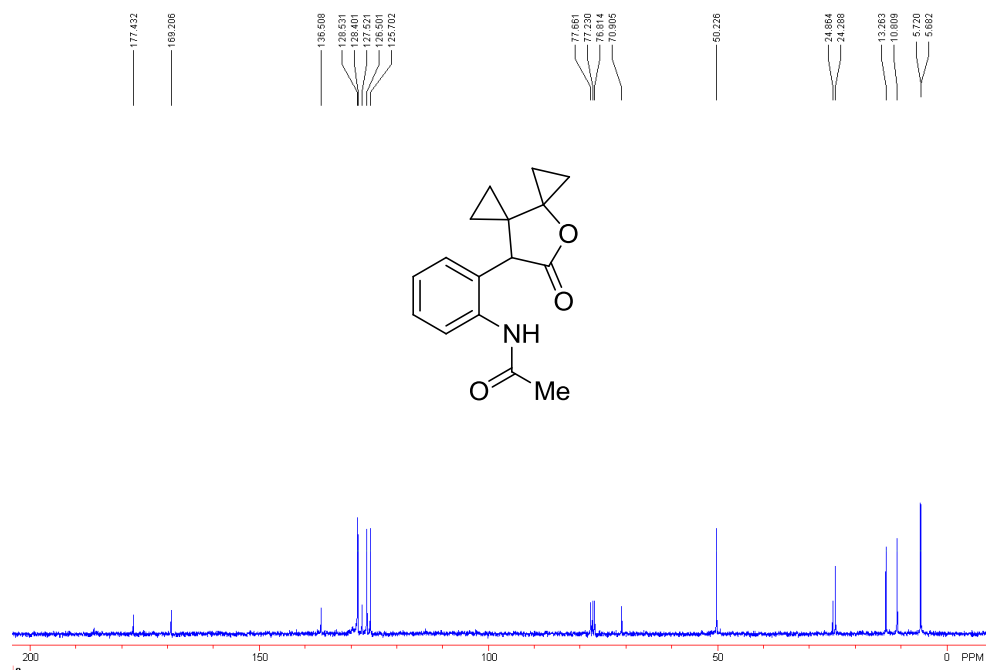

### $^{1}\text{H}$ NMR( $\text{CDCl}_3$ )

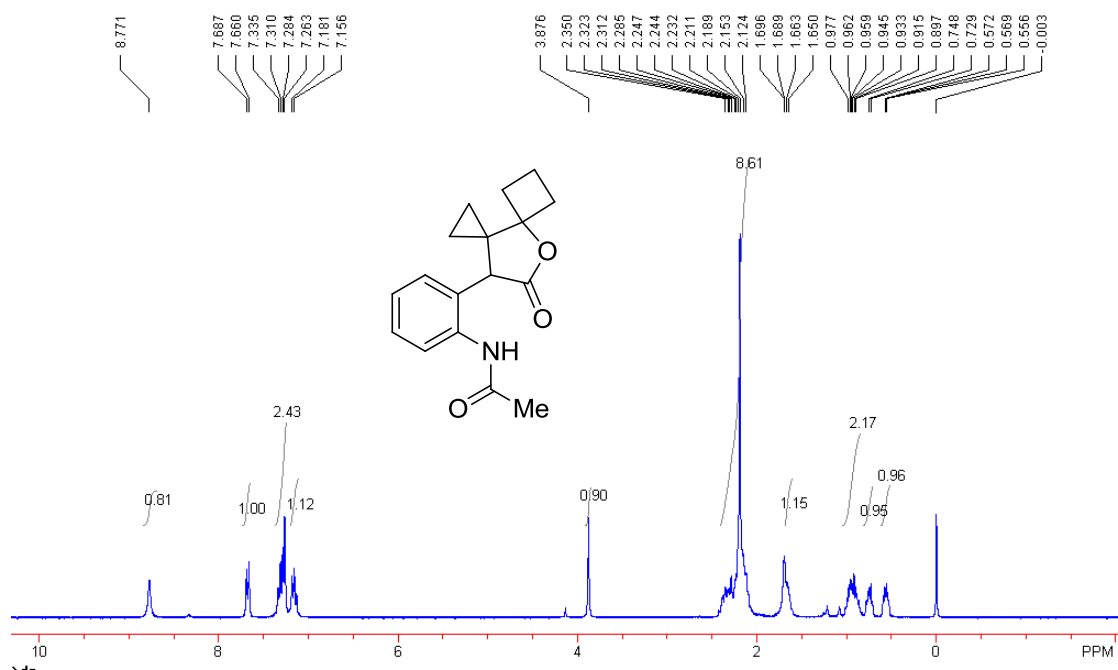

### $^{13}\text{C}$ NMR( $\text{CDCl}_3$ )

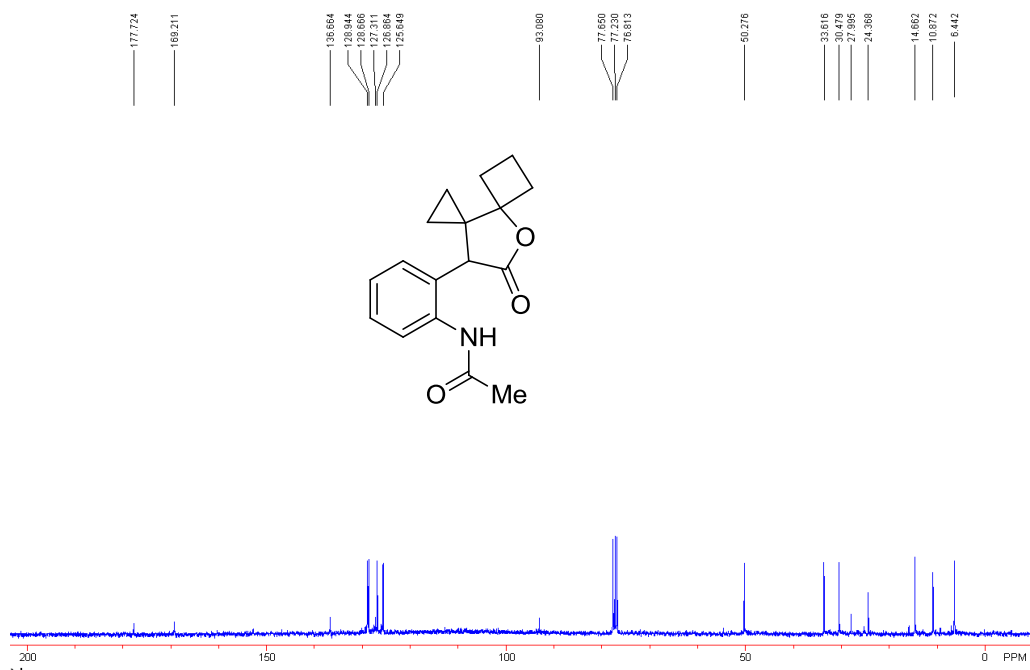

### 11-<sup>1</sup>H NMR(CDCl<sub>3</sub>)

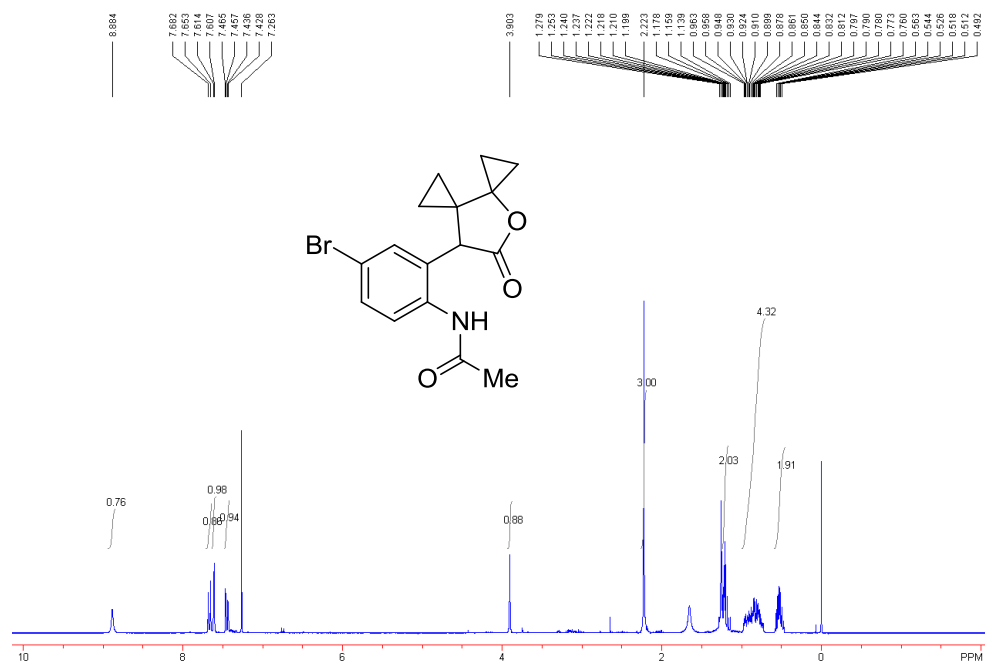

### 11-<sup>13</sup>C NMR(CDCl<sub>3</sub>)

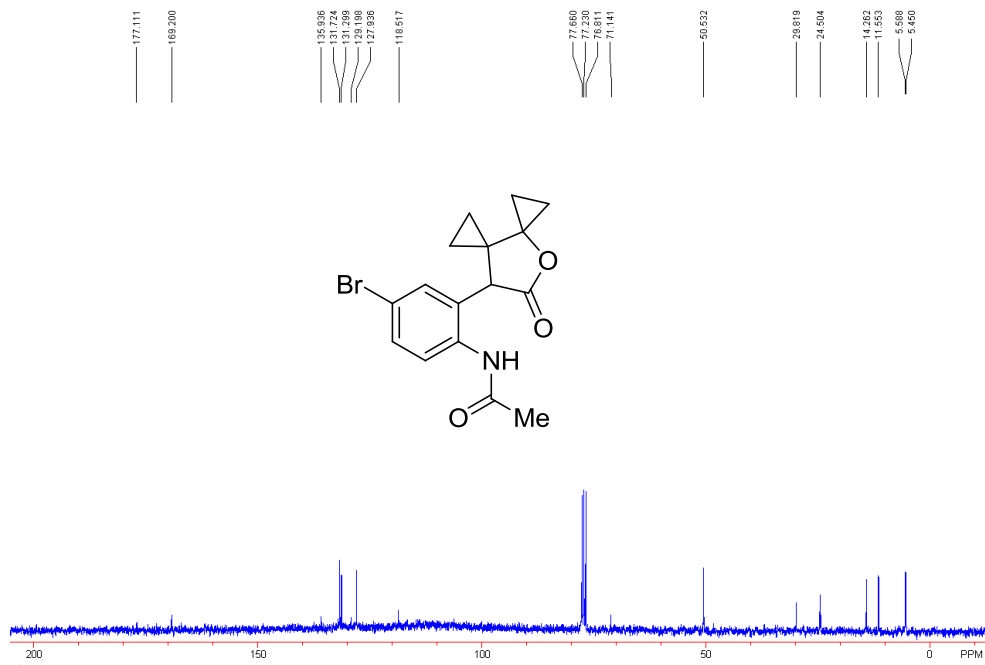

### 12-<sup>1</sup>H NMR(CDCl<sub>3</sub>)

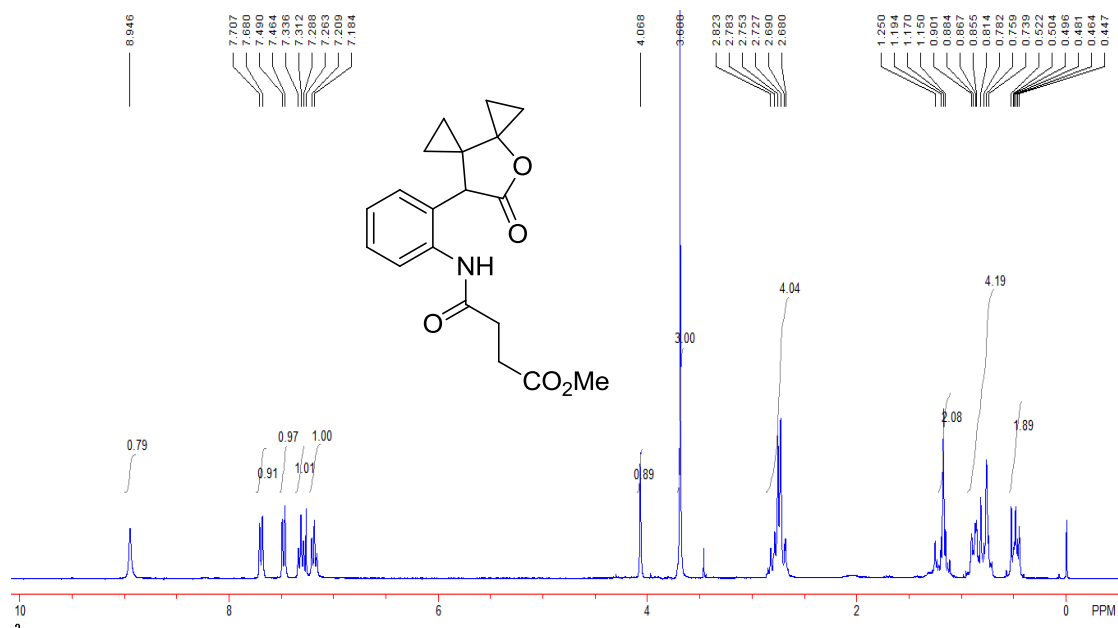

### 12-<sup>13</sup>C NMR(CDCl<sub>3</sub>)

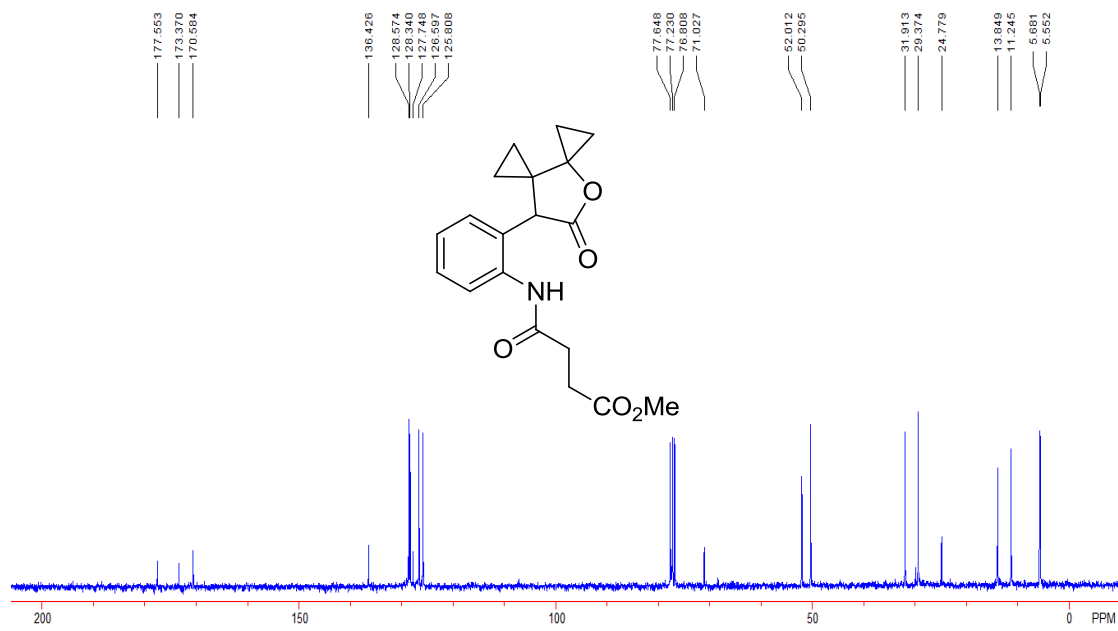

### $^{13}\text{C}$ NMR(CDCl<sub>3</sub>)

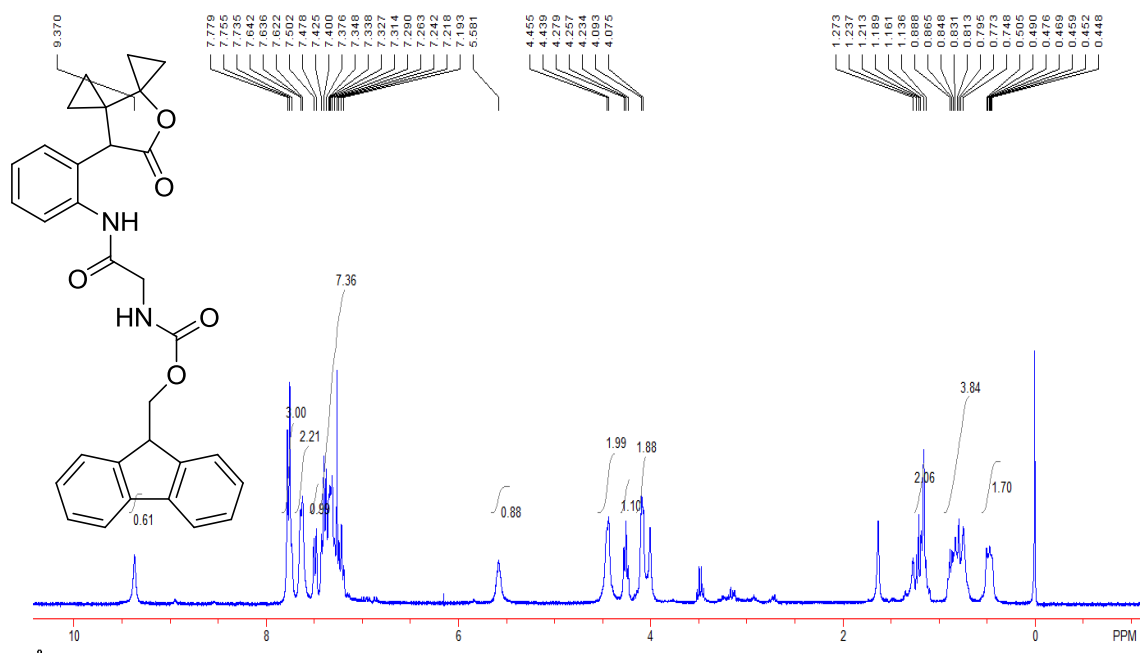

### $^{13}\text{C}$ NMR(CDCl<sub>3</sub>)

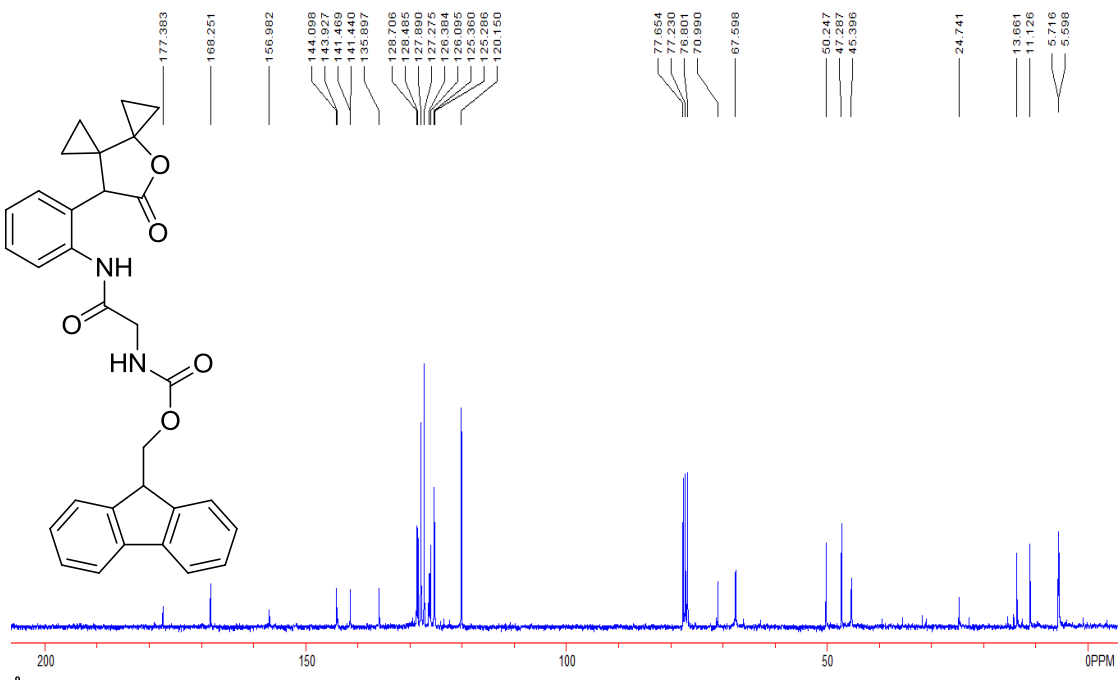



### 14-<sup>1</sup>H NMR(CDCl<sub>3</sub>)

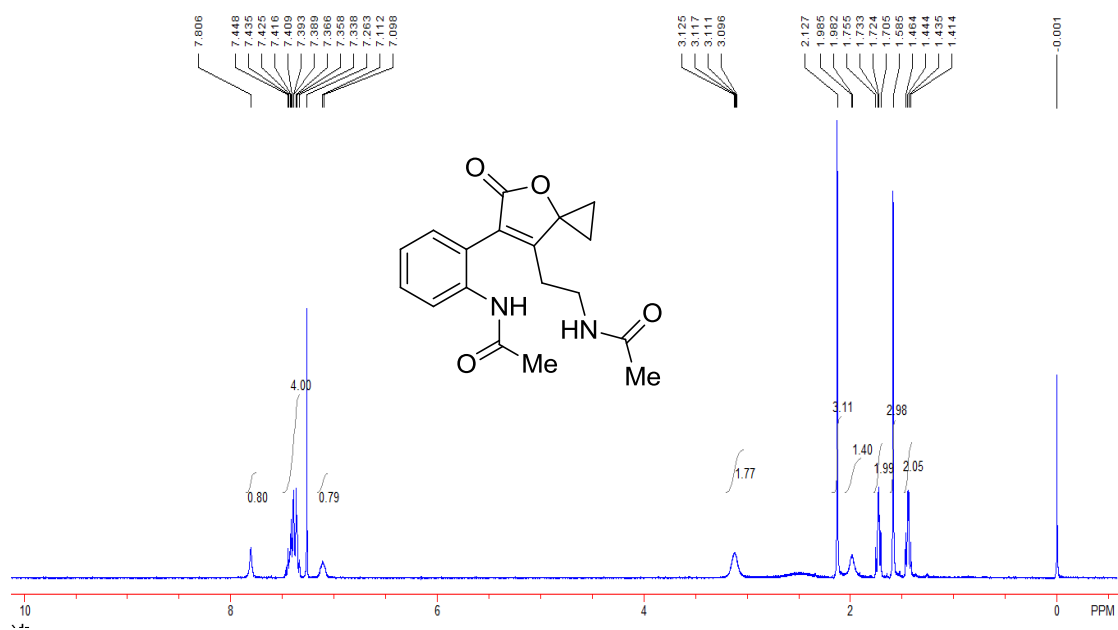

### 14-<sup>13</sup>C NMR(CDCl<sub>3</sub>)

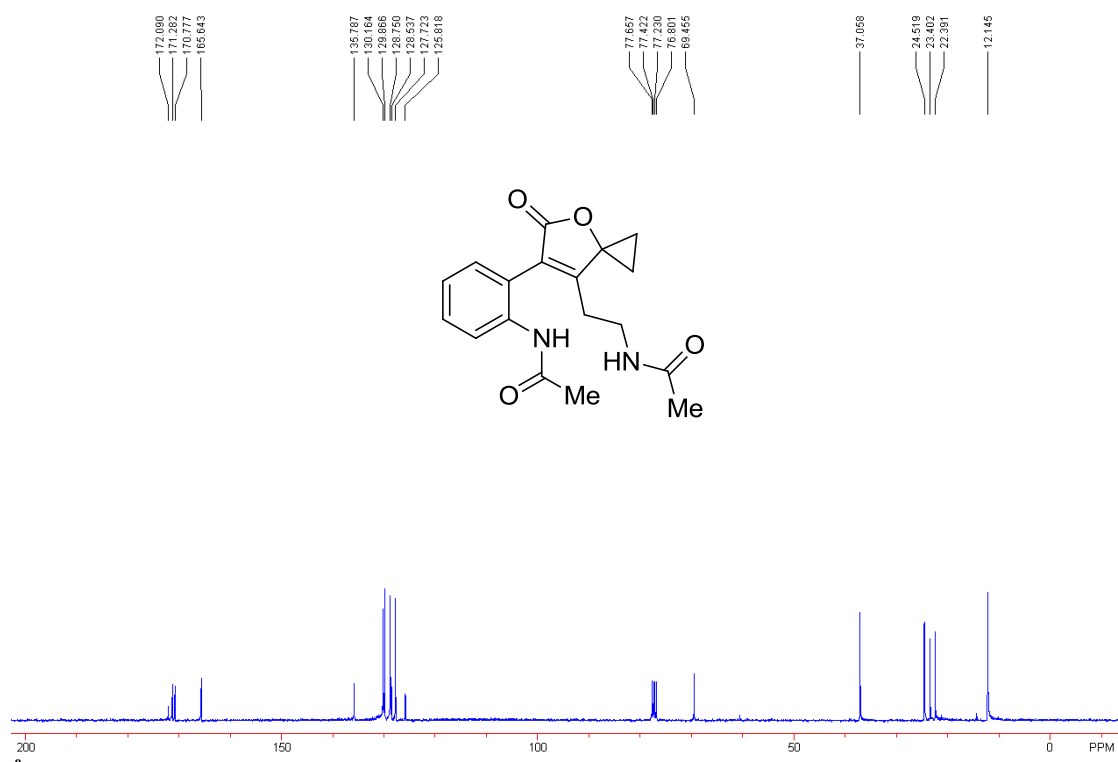

### 15-<sup>1</sup>H NMR(CDCl<sub>3</sub>)

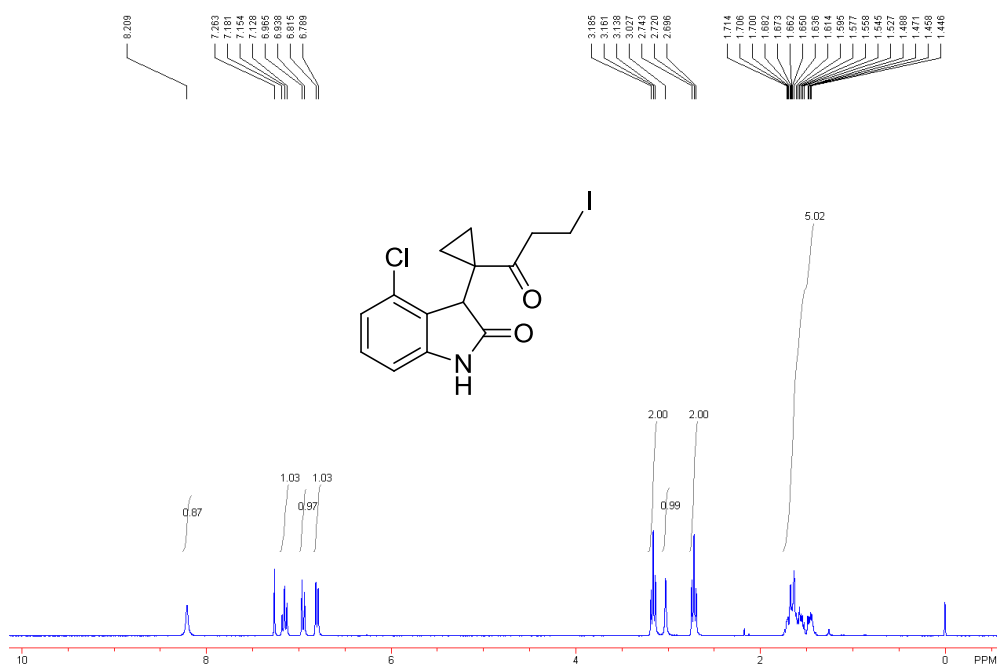

### 15-<sup>13</sup>C NMR(CDCl<sub>3</sub>)

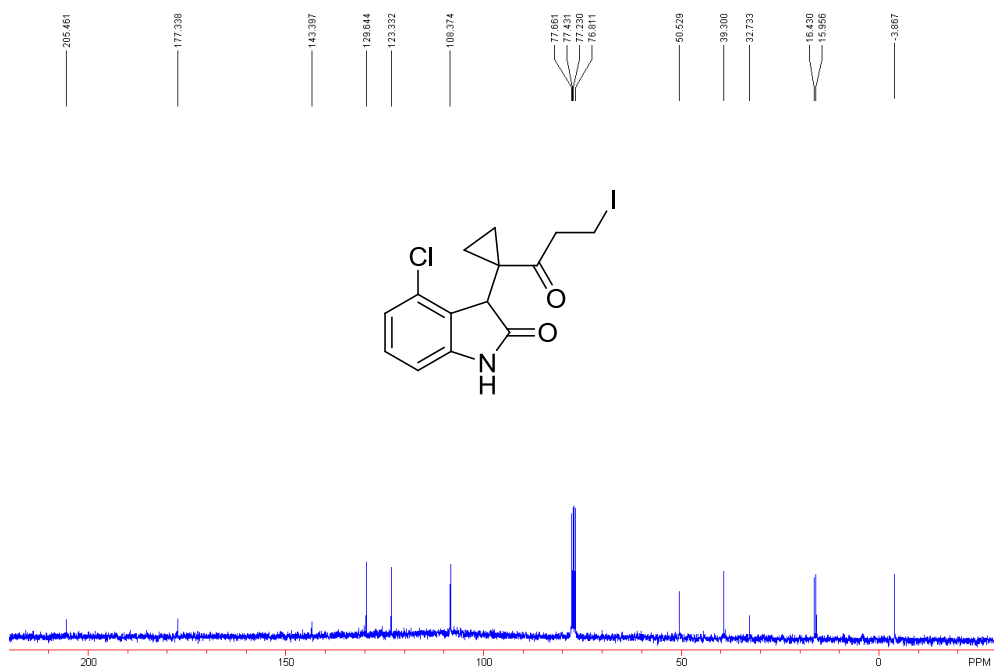

### 16-<sup>1</sup>H NMR(CDCl<sub>3</sub>)

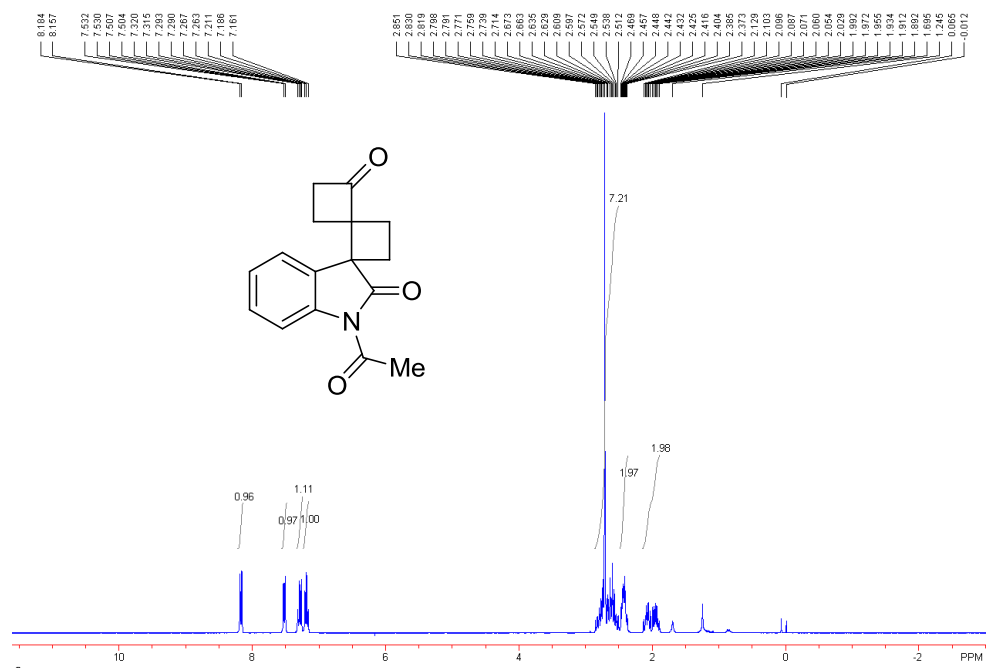

### 16-<sup>13</sup>C NMR(CDCl<sub>3</sub>)

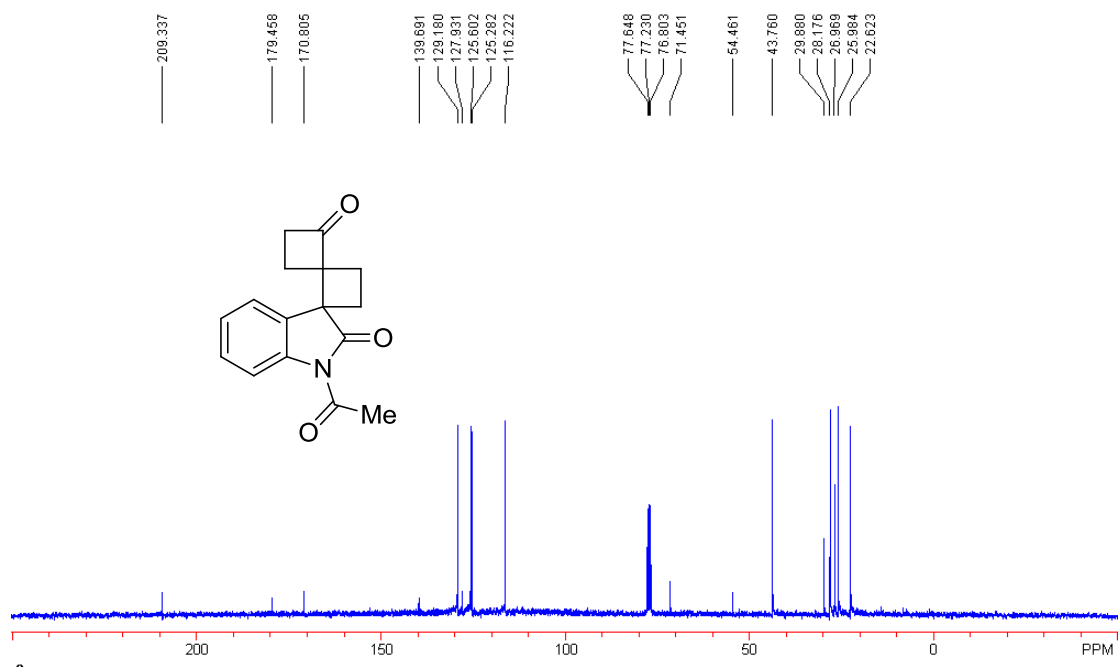

### $^{17}\text{-}^1\text{H NMR}(\text{CDCl}_3)$

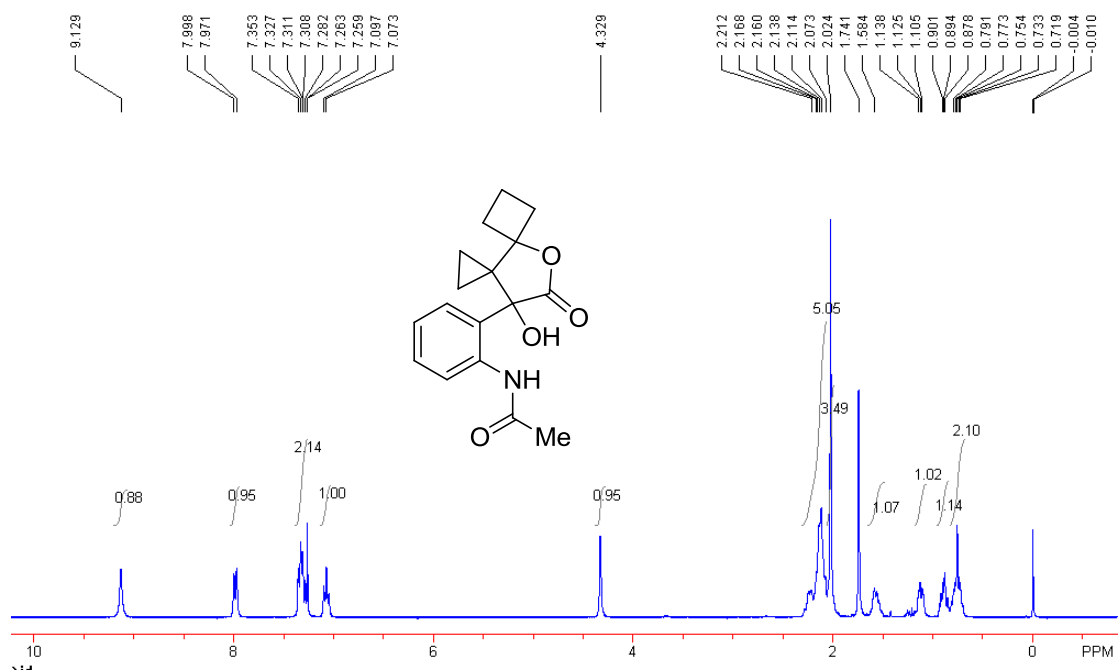

### $^{17}\text{-}^{13}\text{C NMR}(\text{CDCl}_3)$

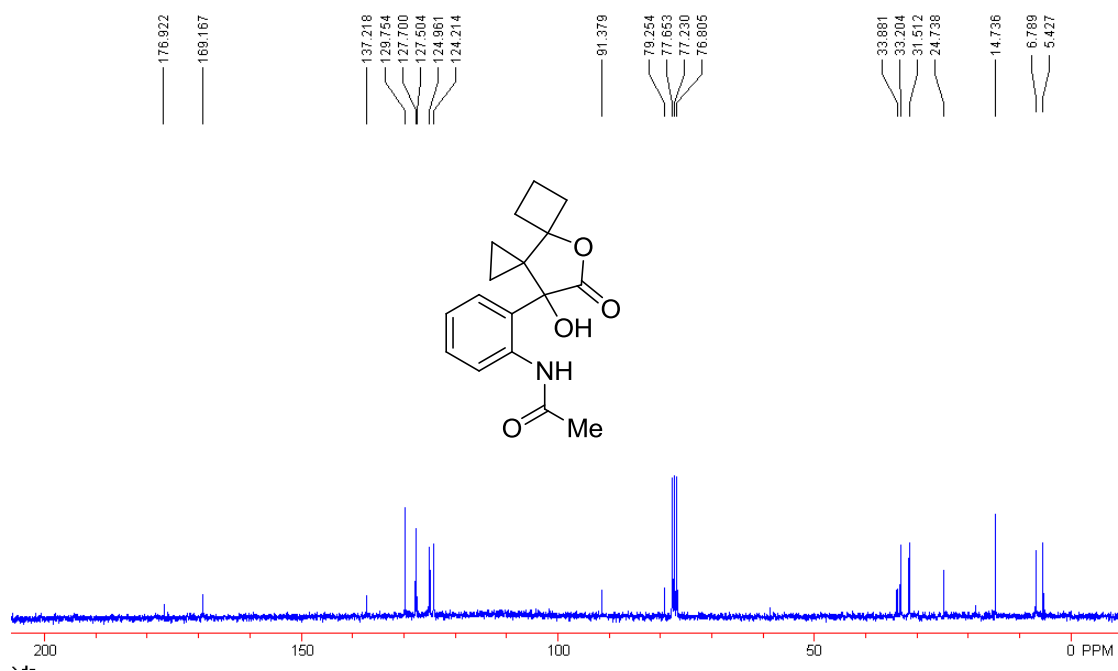

### 16c-<sup>1</sup>H NMR(CDCl<sub>3</sub>)

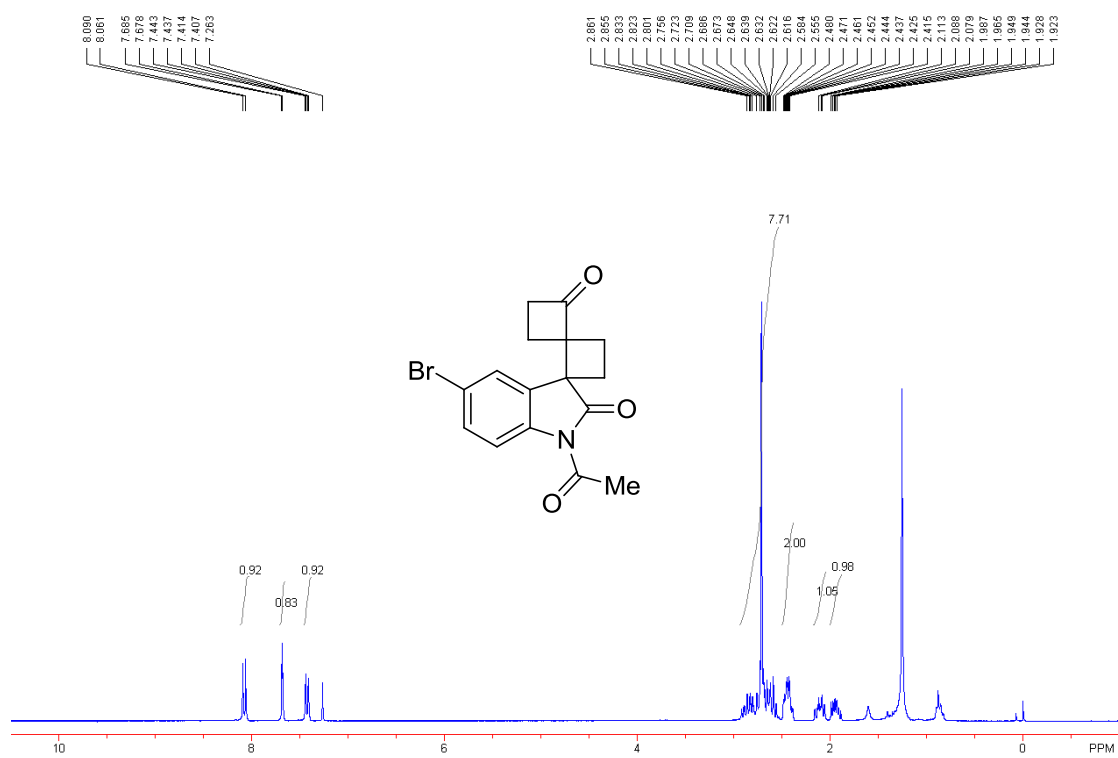

### 16c-<sup>13</sup>C NMR(CDCl<sub>3</sub>)

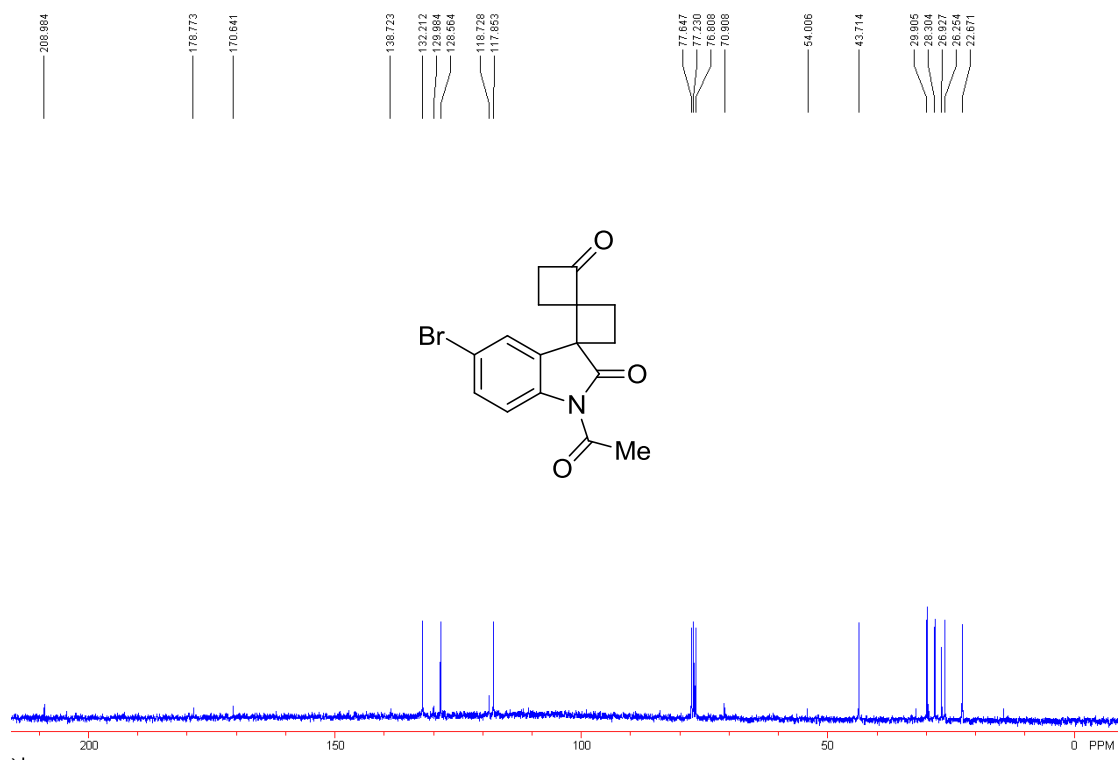

### 16e-<sup>1</sup>H NMR(CDCl<sub>3</sub>)

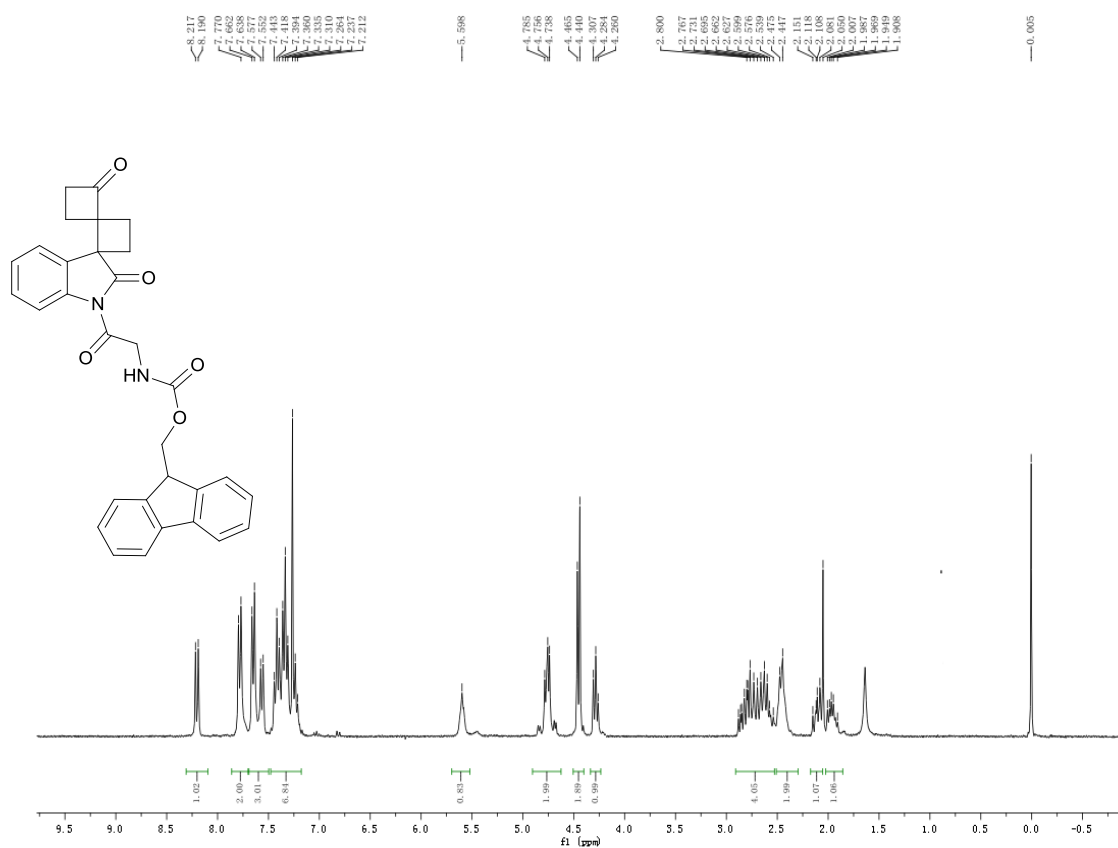

### 16e-<sup>13</sup>C NMR(CDCl<sub>3</sub>)

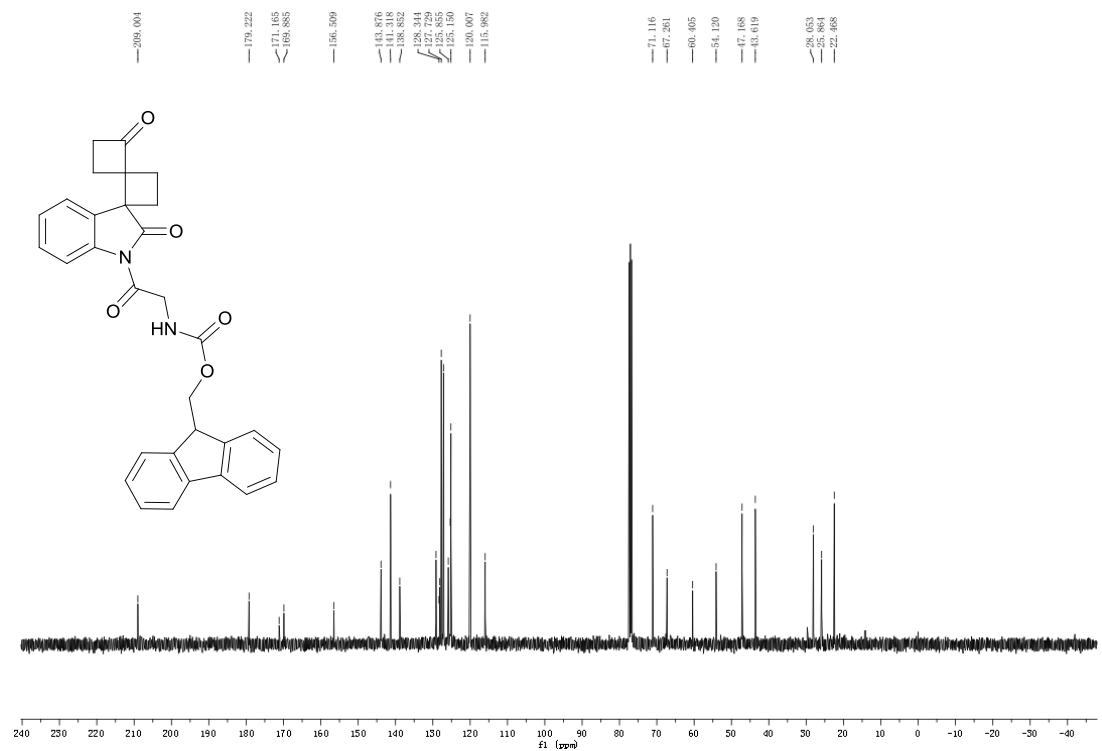

### 16f-<sup>1</sup>H NMR(CDCl<sub>3</sub>)

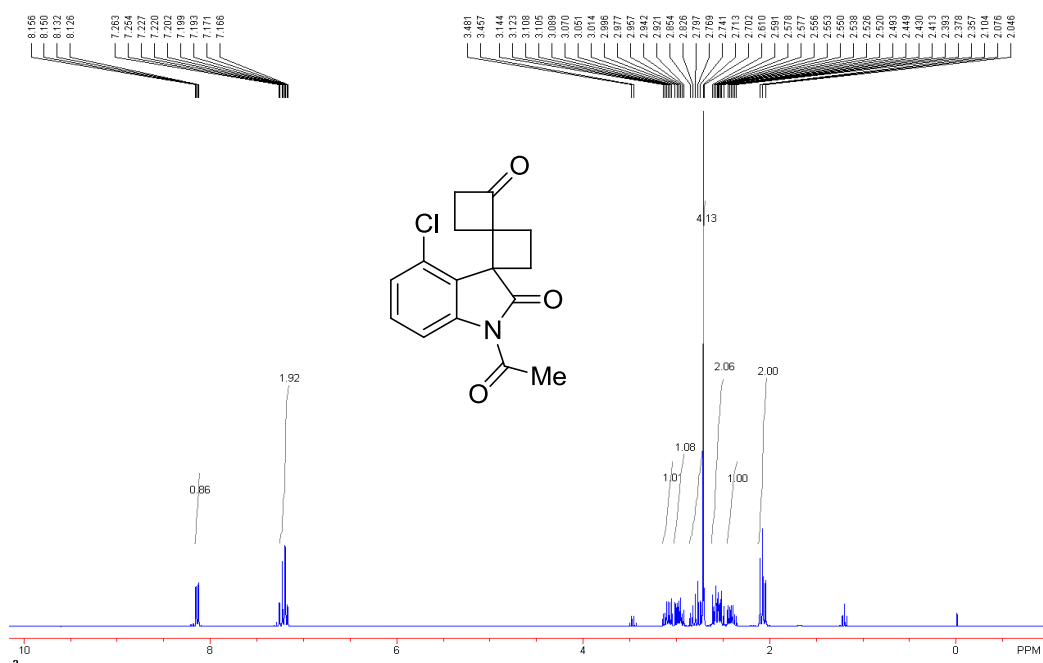

### 16f-<sup>13</sup>C NMR(CDCl<sub>3</sub>)

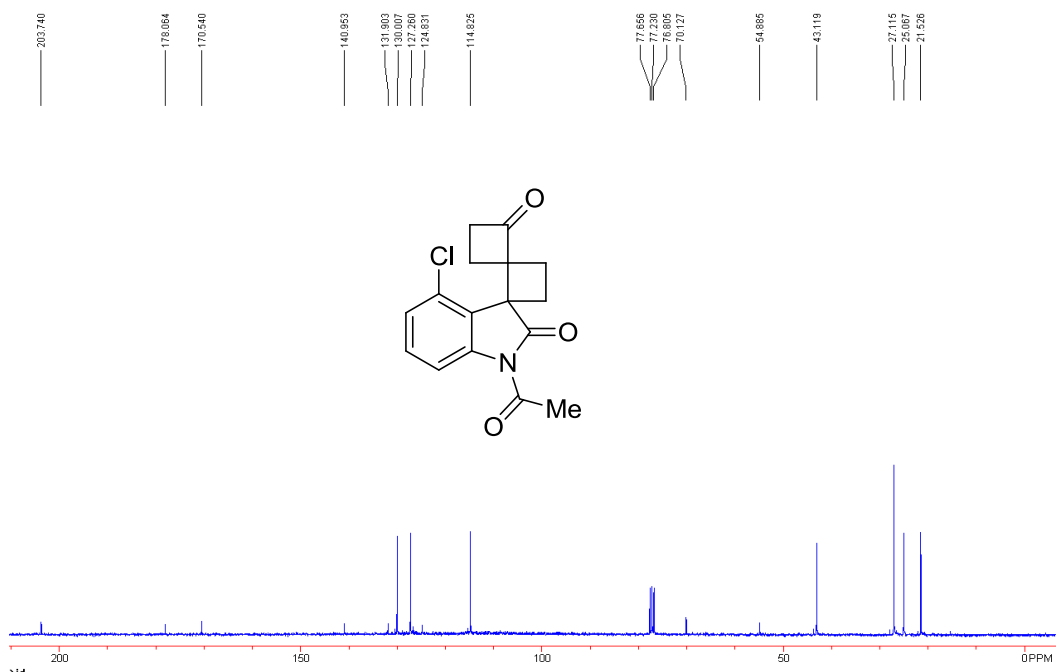

Supplement: c3ra00178d.pdf [file c3ra00178d.pdf]
